# Supplementary material for: Structure of the H-NS–DNA nucleoprotein complex
Source: Royal Society of Chemistry journal article supplement (doi:10.1039/c5sm03076e), 2016-01-01
Supplement: c5sm03076e1.pdf [file c5sm03076e1.pdf]

**Structure of the H-NS–DNA nucleoprotein complex**  
**(supplementary material)**

Johan R.C. van der Maarel and Durgarao Guttula

*National University of Singapore, Department of Physics, 117542, Singapore*

Véronique Arluison

*Laboratoire Léon Brillouin, UMR 12 CEA/CNRS,*

*CEA–Saclay, Gif sur Yvette Cedex 91191,*

*France and Université Paris Diderot,*

*Sorbonne Paris Cité, 75013 Paris, France*

Stefan U. Egelhaaf

*Heinrich-Heine University, Condensed Matter*

*Physics Laboratory, Düsseldorf, 40225, Germany*

Isabelle Grillo

*Institut Laue-Langevin, 38042 Grenoble, France*

V. Trevor Forsyth

*Institut Laue-Langevin, 38042 Grenoble,*

*France and Keele University, Faculty of Natural Sciences,*

*Staffordshire, ST5 5BG, United Kingdom*

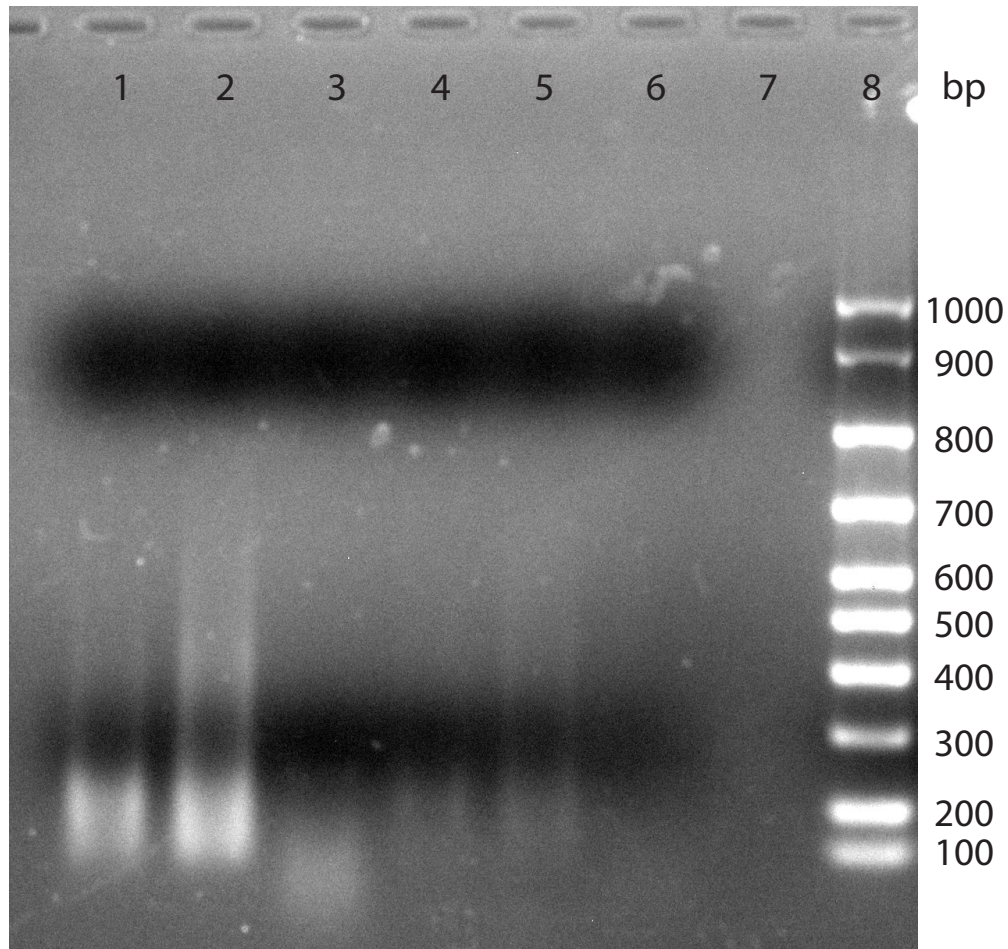

FIG. S1. Agarose gel of DNA obtained by micrococcal digestion of calf thymus chromatin. Lanes: (1) and (2), 150 bp fragments used for SANS; (3-7), irrelevant samples; (8), 100 bp DNA marker. As described in Ref (17), the 150 bp fragments have an average molecular weight  $M_w = 104$  kDa and typical polydispersity  $M_w/M_n = 1.15$ .

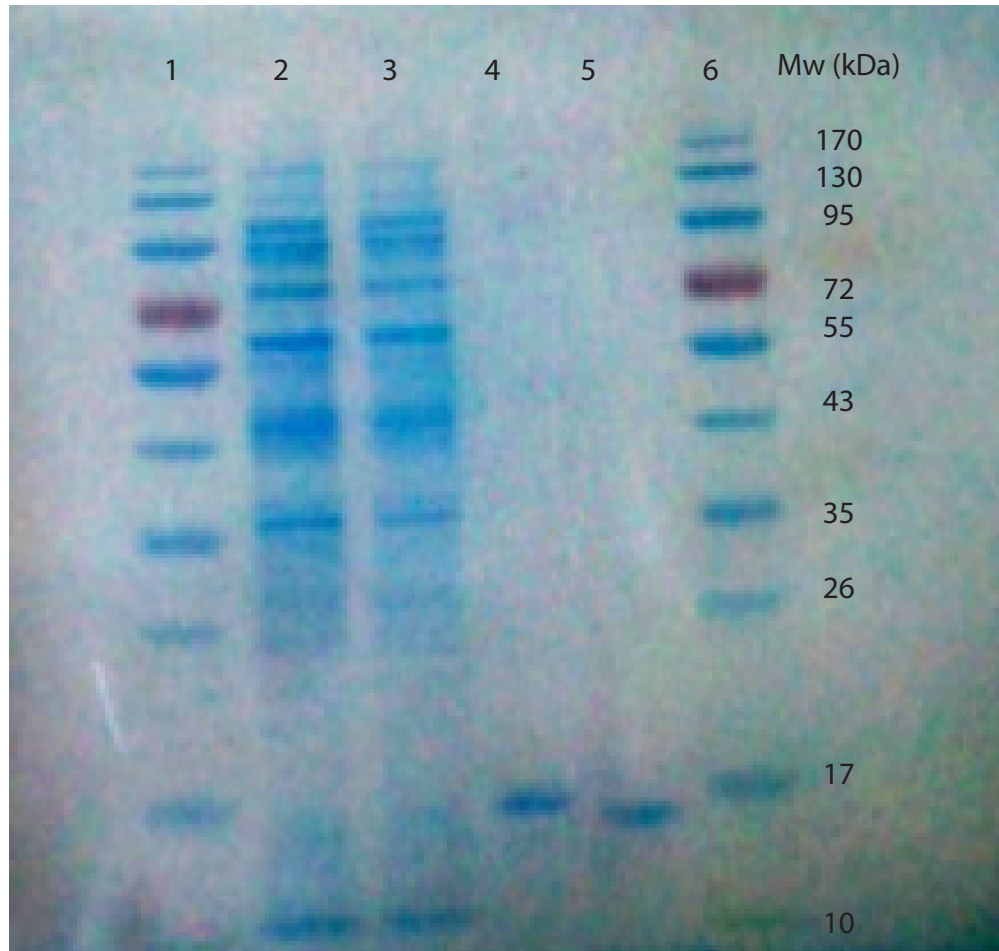

FIG. S2. Coomassie-stained Tris-Tricine PAGE of *E. coli* H-NS protein purification steps. Lanes: (1) and (6), pre-stained protein ladder (ThermoScientific SM0671); (2) and (3), pre- and post-IPTG induced aliquots; (4), H-NS-His<sub>6</sub> post-Ni<sup>2+</sup>-NTA purification; (5), untagged H-NS after TEV digestion and His<sub>6</sub> removal.
